# Supplementary material
Source: PubMed Central journal article supplement (PMC11386569)
Supplement: PBI-18-129-s001.pdf [file PBI-18-129-s001.pdf]

## Supporting information

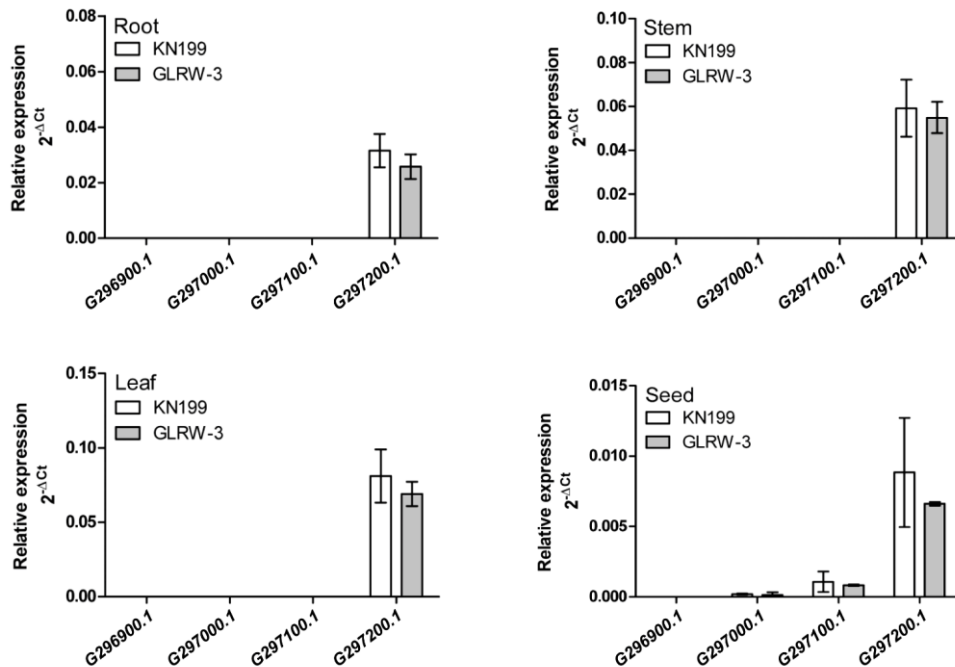

**Figure S1.** Analysis of the expression of the four genes flanking the T-DNA insertion site in GLRW-3. The genes *G296900.1* and *G297000.1* (*TraesCS1D02G296900.1* and *TraesCS1D02G297000.1*) are upstream, whereas *G297100.1* and *G297200.1* (*TraesCS1D02G297100.1* and *TraesCS1D02G297200.1*) are downstream of the integration site. Their expression in the root, stem, leaf and seed tissues were assessed using qRT-PCR with gene specific primers (Table S5). The root, stem and leaf samples were prepared from the wheat plants at heading stage, while the seed sample was collected at 30 DAA. The values shown were means ( $\pm$  SD) of three independent experiments.

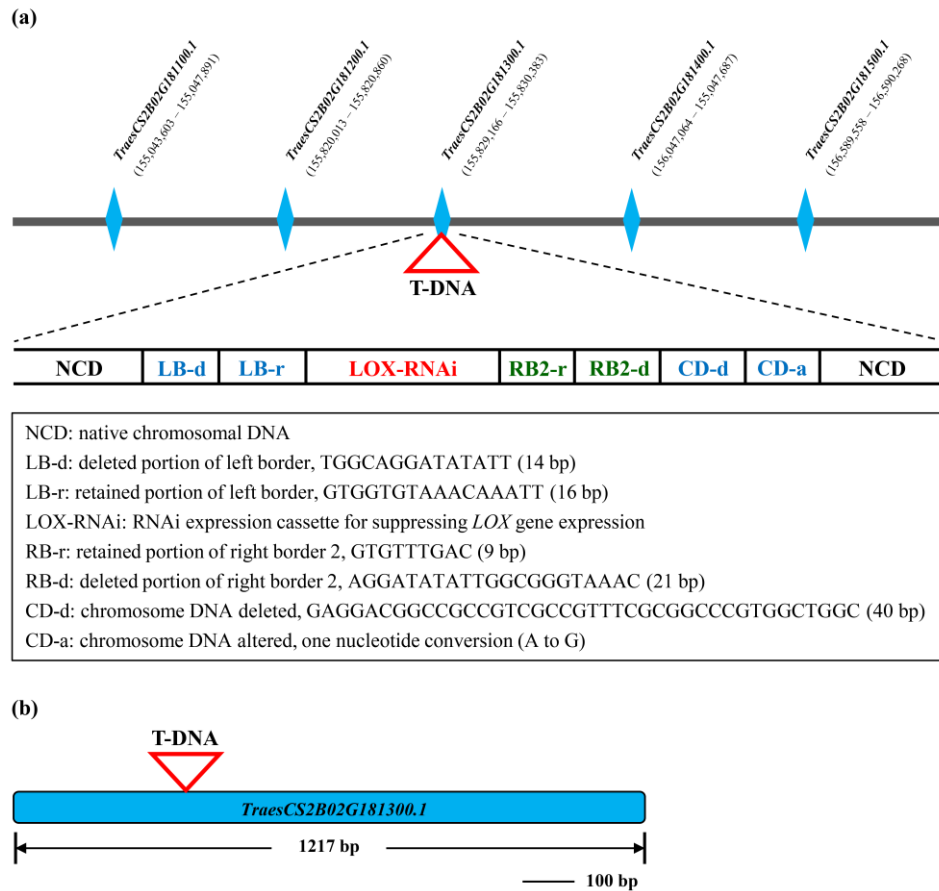

**Figure S2.** Elucidation of T-DNA integration site in GLRW-8. (a) The T-DNA was inserted into the gene *TraesCS2B02G181300.1* on chromosome 2B, which was flanked by the upstream genes *TraesCS2B02G181100.1* and *TraesCS2B02G181200.1* and the downstream genes *TraesCS2B02G181400.1* and *TraesCS2B02G181500.1*. The coordinates shown were based on the annotation deposited in Ensembl Plants ([http://plants.ensembl.org/Triticum\\_aestivum/Info/Index](http://plants.ensembl.org/Triticum_aestivum/Info/Index)). The different changes occurred to T-DNA or wheat chromosomal DNA are summarized in the box at the bottom. (b) A diagram showing the location of the T-DNA insertion in the single exon (747 bp) of *TraesCS2B02G181300.1*.

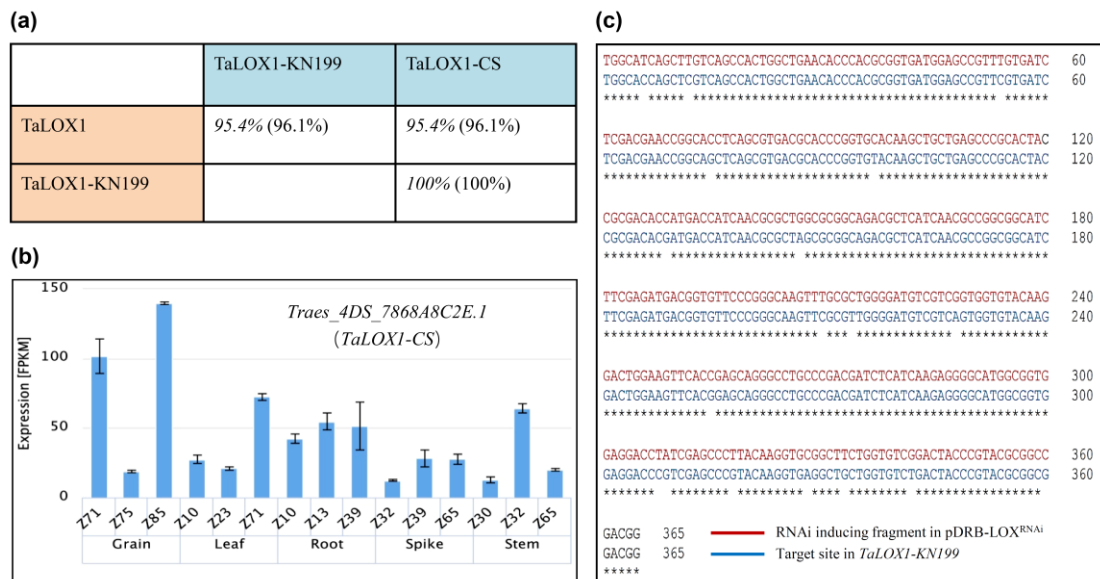

**Figure S3.** Characterization of *TaLOX1-KN199* allele. (a) Identities among three *TaLOX1* alleles (*TaLOX1*, *LOX1-KN199* and *TaLOX1-CS*). Their nucleotide sequence identities (italicized) varied from 95.4 to 100%, while their amino acid sequence identities (in brackets) ranged from 96.1 to 100%. (b) Expression profile of *TaLOX1-CS* in the grain, leaf, root, spike and stem tissues of Chinese Spring. The expression data were derived from the WheatExp website (<https://wheat.pw.usda.gov/WheatExp/>). *TaLOX1-CS* was named as *Traes\_4DS\_7868A8C2E.1* by International Wheat Genome Sequencing Consortium (2014). Z10-Z85 are Zadoks growth stages of wheat, with Z85 indicating the soft dough stage at 30 days post anthesis. (c) Comparison between the RNAi inducing fragment in pDRB-LOX<sup>RNAi</sup> and its target site in *TaLOX1-KN199*.

**Table S1.** Comparison of flour FA contents of KN199 and three transgenic lines cultivated in the field in 2017

|        | Palmitic acid<br>(C16:0)                | Stearic acid<br>(C18:0) | Oleic acid<br>(C18:1)    | Linoleic acid<br>(C18:2)   | Linolenic acid<br>(C18:3) | Total                       |
|--------|-----------------------------------------|-------------------------|--------------------------|----------------------------|---------------------------|-----------------------------|
| KN199  | 8.15 ± 0.25                             | 3.82 ± 0.65             | 0.15 ± 0.03              | 9.14 ± 0.55                | 0.26 ± 0.04               | 21.52 ± 0.22                |
| GLRW-1 | 10.58 ± 0.60**<br>[29.82%] <sup>a</sup> | 4.43 ± 0.46<br>[15.97%] | 0.26 ± 0.05*<br>[73.33%] | 11.48 ± 0.49**<br>[25.60%] | 0.31 ± 0.05<br>[19.23%]   | 27.06 ± 0.44***<br>[25.74%] |
| GLRW-3 | 11.03 ± 0.81**<br>[35.34%]              | 4.03 ± 0.16<br>[5.50%]  | 0.26 ± 0.05*<br>[73.33%] | 11.74 ± 0.68**<br>[28.45%] | 0.40 ± 0.06*<br>[53.85%]  | 27.45 ± 0.36***<br>[27.56%] |
| GLRW-5 | 9.56 ± 0.39**<br>[17.30%]               | 3.88 ± 0.52<br>[1.57%]  | 0.25 ± 0.05*<br>[66.67%] | 10.54 ± 0.51*<br>[15.32%]  | 0.33 ± 0.05<br>[26.92%]   | 24.56 ± 1.26**<br>[14.13%]  |

**Note:** each value ( $\mu\text{g}/\text{mg}$  flour) was the mean  $\pm$  SD of three different determinations with separate flour samples; \*, \*\* and \*\*\* indicate statistical difference from KN199 (WT control) at  $P < 0.05$ , 0.01 and 0.001, respectively.

<sup>a</sup> The value in the square brackets indicates the percentage of increase over KN199.

**Table S2.** Field assessment of important agronomic traits of three transgenic GLRW lines in 2017

|           | Plant height<br>(PH, cm) | Tiller number<br>per plant (TNPP) | Spike length<br>(SL, cm) | Grain number<br>per spike (GNPS) | Grain length<br>(GL, mm) | Grain width<br>(GWH, mm) | Thousand grain<br>weight (TGW, g) |
|-----------|--------------------------|-----------------------------------|--------------------------|----------------------------------|--------------------------|--------------------------|-----------------------------------|
| Kenong199 | 72.64 ± 0.24             | 15.21 ± 0.55                      | 7.89 ± 0.11              | 42.99 ± 2.18                     | 6.05 ± 0.01              | 3.55 ± 0.03              | 44.36 ± 0.57                      |
| GLRW-1    | 72.94 ± 1.13             | 13.13 ± 0.19*                     | 8.72 ± 0.03***           | 41.16 ± 0.25                     | 6.11 ± 0.03              | 3.53 ± 0.02              | 44.49 ± 0.58                      |
| GLRW-3    | 72.17 ± 0.45             | 15.03 ± 0.14                      | 8.68 ± 0.05**            | 35.20 ± 1.99*                    | 6.17 ± 0.08              | 3.52 ± 0.02              | 45.09 ± 0.38                      |
| GLRW-5    | 73.03 ± 0.40             | 14.47 ± 0.54                      | 8.37 ± 0.06**            | 41.98 ± 0.07                     | 6.07 ± 0.02              | 3.54 ± 0.01              | 45.03 ± 0.11                      |

**Note:** each value was the mean ± SD of 40 different determinations with separate samples; \*, \*\*, and \*\*\* indicate statistically significant difference from Kenong 199 (WT control) at  $P < 0.05$ , 0.01 and 0.001, respectively.

**Table S3.** Comparison of important agronomic traits between Kenong 199 and three transgenic GLRW lines in 2017-2018 growth season

|            | Plant height<br>(PH, cm) | Tiller number<br>per plant (TNPP) | Spike length<br>(SL, cm) | Grain number<br>per spike (GNPS) | Grain length<br>(GL, mm) | Grain width<br>(GWH, mm) | Thousand grain<br>weight (TGW, g) | Plot yield<br>(PY, kg) |
|------------|--------------------------|-----------------------------------|--------------------------|----------------------------------|--------------------------|--------------------------|-----------------------------------|------------------------|
| Kenong 199 | 73.88 ± 0.30             | 10.69 ± 0.33                      | 6.50 ± 0.19              | 29.71 ± 0.98                     | 6.10 ± 0.02              | 3.52 ± 0.03              | 42.65 ± 0.85                      | 8.88 ± 0.31            |
| GLRW-1     | 73.75 ± 0.53             | 10.21 ± 0.34                      | 6.50 ± 0.27              | 32.16 ± 0.55*                    | 6.05 ± 0.02              | 3.55 ± 0.02              | 43.10 ± 0.50                      | 8.87 ± 0.14            |
| GLRW-3     | 73.88 ± 0.82             | 10.36 ± 0.41                      | 6.50 ± 0.28              | 32.45 ± 0.52*                    | 6.11 ± 0.02              | 3.56 ± 0.02              | 44.19 ± 0.49                      | 9.00 ± 0.27            |
| GLRW-5     | 74.00 ± 0.53             | 10.86 ± 0.46                      | 6.63 ± 0.18              | 31.53 ± 0.55                     | 6.12 ± 0.01              | 3.50 ± 0.02              | 41.48 ± 0.41                      | 9.05 ± 0.09            |

**Note:** each value was the mean ± SD of 40 different determinations with separate samples; ‘\*’ indicates statistically significant difference from Kenong 199 (WT control) at  $P < 0.05$ .

**Table S4.** Annual stocks of three major cereal grains in the world in recent years (beginning stocks,1000 metric tons)

|           | Wheat  | Rice   | Maize  |
|-----------|--------|--------|--------|
| 2010/2011 | 204078 | 96580  | 131653 |
| 2011/2012 | 199308 | 101967 | 115381 |
| 2012/2013 | 199496 | 111858 | 123226 |
| 2013/2014 | 179023 | 122973 | 144619 |
| 2014/2015 | 197014 | 127692 | 214274 |
| 2015/2016 | 222308 | 135076 | 279204 |
| 2016/2017 | 244385 | 142561 | 311378 |
| 2017/2018 | 261046 | 149681 | 350243 |

**Note:** the data presented were retrieved from the website <https://apps.fas.usda.gov/psdonline/app/index.html#/app/home>.

**Table S5.** Oligonucleotide primers used in this study

|            | Primer sequence (5' - 3')  | Use                                                                             |
|------------|----------------------------|---------------------------------------------------------------------------------|
| LOXi-F     | GCAGGCTACCTTCCACTACTCG     | Detection of LOX <sup>RNAi</sup> hairpin (Amplicon length: 1180 bp)             |
| LOXi-R     | GACGACGGCACCCAGATACA       |                                                                                 |
| Bar-F      | TGCACCATCGTCAACCACTACAT    | Detection of <i>Bar</i> gene<br>(Amplicon length: 426 bp)                       |
| Bar-R      | GCTGCCAGAAACCCACGTCAT      |                                                                                 |
| 1D296900-F | CACCGAACGCCTCCAATG         | qRT-PCR assay of<br><i>TraesCS1D02G296900.1</i>                                 |
| 1D296900-R | CGGGCTCCCAGATGACTAA        |                                                                                 |
| 1D297000-F | TGACGGGCAGCGAAACAG         | qRT-PCR assay of<br><i>TraesCS1D02G297000.1</i>                                 |
| 1D297000-R | ATCGGTGACCGCCGAAGA         |                                                                                 |
| 1D297100-F | CCGACCACAGGCACCAAT         | qRT-PCR assay of<br><i>TraesCS1D01G297100.1</i>                                 |
| 1D297100-R | ACGAAGGACCCGAATGG          |                                                                                 |
| 1D297200-F | GACAAGGCGCTCGACTACCTG      | qRT-PCR assay of<br><i>TraesCS1D02G297200.1</i>                                 |
| 1D297200-R | CGACAGCGTCAATGGATCAGG      |                                                                                 |
| LOX-KN199F | GCATGGTACATCGGAGCTT        | qRT-PCR assay of <i>TaLOX1-KN199</i>                                            |
| LOX-KN199R | GCATAACTAAGATGCACACGG      |                                                                                 |
| Actin-F    | CAACGAGCTCCGTGTCGCA        | Amplification of wheat <i>Actin</i> gene (as internal control of qRT-PCR assay) |
| Actin-R    | GAGGAAGCGTGTATCCCTCATAG    |                                                                                 |
| RB550      | TTGCTCCCTAGCCCCTGCCTCTCTGC | Specific primer used in first round TAIL-PCR                                    |
| RB402      | GGAAATAGGTAAAGAAGTTGCGGATA | Specific primer used in second round TAIL-PCR                                   |
| RB322      | GGATACCGAGGGGAATTTATGGAACG | Specific primer used in third round TAIL-PCR                                    |
| RB258      | ATAGTGACCTTAGGCGACTTTTGAAC | Primer used for sequencing TAIL-PCR products                                    |
| AD1        | NTCGASTWTSWGTT             | Arbitrary degenerate primer 1 used in TAIL-PCR                                  |
| AD2        | NGTCGASWGANAWGAA           | Arbitrary degenerate primer 2 used in TAIL-PCR                                  |
| AD3        | WCAGNTGWTNGTNCTG           | Arbitrary degenerate primer 3 used in TAIL-PCR                                  |
| AD4        | WGTGNAGWANCANAGA           | Arbitrary degenerate primer 4 used in TAIL-PCR                                  |
| AD5        | NTCAGSTWTSWGWT             | Arbitrary degenerate primer 5 used in TAIL-PCR                                  |
| AD6        | TGWGNAGWANCASAGA           | Arbitrary degenerate primer 6 used in TAIL-PCR                                  |
| AD7        | AGWGNAGWANCAWAGG           | Arbitrary degenerate primer 7 used in TAIL-PCR                                  |
| AD8        | CAWCGICNGGAIASGAA          | Arbitrary degenerate primer 8 used in TAIL-PCR                                  |



|        |                            |                                                           |
|--------|----------------------------|-----------------------------------------------------------|
| AD9    | TCSTICGNACITWGGA           | Arbitrary degenerate primer 9 used in TAIL-PCR            |
| AD10   | WGTGNWANAGA                | Arbitrary degenerate primer 10 used in TAIL-PCR           |
| AD11   | TCSTNAGWACNTWGGA           | Arbitrary degenerate primer 11 used in TAIL-PCR           |
| AD12   | NGTCGTSWGANAWGTT           | Arbitrary degenerate primer 12 used in TAIL-PCR           |
| AD13   | NCAGCTSWCTNTWGAA           | Arbitrary degenerate primer 13 used in TAIL-PCR           |
| AD14   | NCTCGTSWGANTWGAAT          | Arbitrary degenerate primer 14 used in TAIL-PCR           |
| AD15   | NGTCGASWCANTWCTA           | Arbitrary degenerate primer 15 used in TAIL-PCR           |
| AD16   | TGWGNAGSANCASAGA           | Arbitrary degenerate primer 16 used in TAIL-PCR           |
| AD17   | NGACGASWGANAWGAA           | Arbitrary degenerate primer 17 used in TAIL-PCR           |
| GT38-F | ATAGTGACCTTAGGCGACTTTTGAAC | Specific primers for validating T-DNA insertion in GLRW-3 |
| GT3-R  | TGGCGTCTTTCCTTATC          |                                                           |
| GT8-R  | AACGGCACGAAGACGAAGAA       | Use with GT38-F to validate T-DNA insertion in GLRW-8     |
